# Supplementary material for: Angiogenin and Osteoprotegerin are type II muscle specific myokines protecting pancreatic beta-cells against proinflammatory cytokines
Source: PubMed Central journal article supplement (PMC6030123; doi:10.1038/s41598-018-28117-2), 2018-07-03
Supplement: 41598_2018_28117_MOESM1_ESM.pdf [file 41598_2018_28117_MOESM1_ESM.pdf]

## **Angiogenin and Osteoprotegerin are type II muscle specific myokines protecting pancreatic beta-cells against proinflammatory cytokines**

Sabine Rutti<sup>1</sup>, Rodolphe Dusaulcy<sup>2</sup>, Jakob S. Hansen<sup>3,4</sup>, Cédric Howald<sup>5</sup>, Emmanouil T. Dermizakis<sup>5</sup>, Bente K. Pedersen<sup>3</sup>, Michel Pinget<sup>1</sup>, Peter Plomgaard<sup>3,4,\*</sup> and Karim Bouzakri<sup>1, \$,\*</sup>

1: UMR DIATHEC, EA 7294, Centre Européen d'Etude du Diabète, Université de Strasbourg, Fédération de Médecine Translationnelle de Strasbourg (FMTS), Bld René Leriche, 67200 Strasbourg, France..

2: Molecular Diabetes Laboratory, Division of Endocrinology-Diabetes-Hypertension and Nutrition, University Hospital/University of Geneva Medical School, 1211 Geneva, Switzerland.

3: Department of Clinical Biochemistry, Rigshospitalet, Copenhagen, Denmark.

4: Centre of Physical Activity Research, Rigshospitalet, Copenhagen, Denmark.

5: Department of Genetic Medicine and Development, University of Geneva Medical School 1211 Geneva, Switzerland; Institute for Genetics and Genomics in Geneva (iGE3), University of Geneva, 1211 Geneva, Switzerland; Swiss Institute of Bioinformatics, Geneva, Switzerland

\* : Equally contribution

\$ Correspondence:

Karim Bouzakri UMR DIATHEC, EA 7294, Centre Européen d'Etude du Diabète, Université de Strasbourg, Fédération de Médecine Translationnelle de Strasbourg (FMTS), Bld René Leriche, 67200 Strasbourg, France. Email : [K.Bouzakri@Ceed-diabete.org](mailto:K.Bouzakri@Ceed-diabete.org)

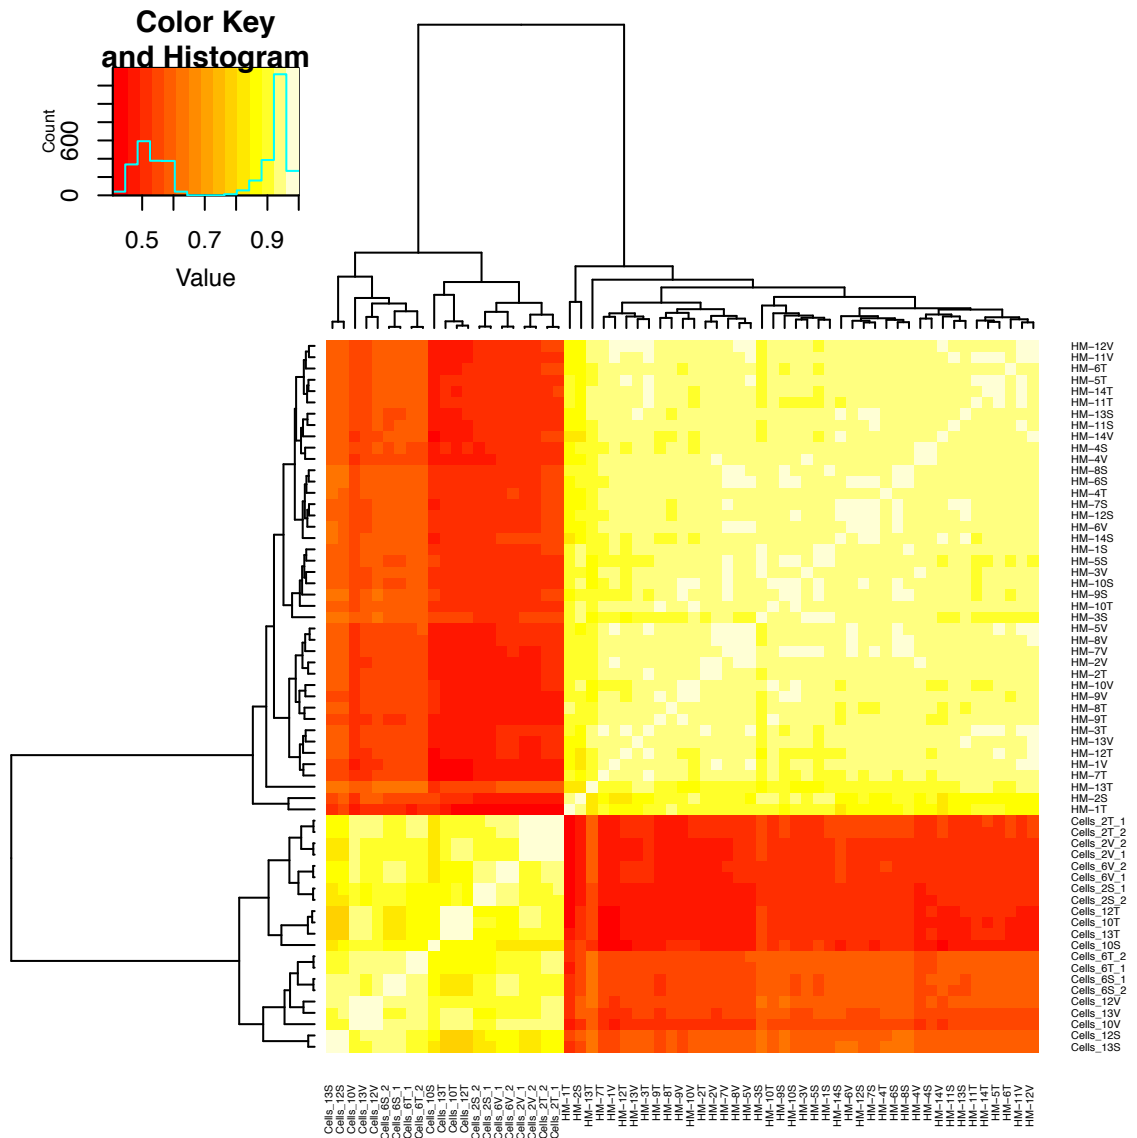

**Figure S1:** Hierarchical clustering of the spearman correlation coefficients of RPKM values. Genes having a RPKM value  $\geq 1$  in at least 90% of the samples were taken into account. Myotubes are well segregated from biopsies but the type of tissue (soleus, triceps and vastus) doesn't cluster together.

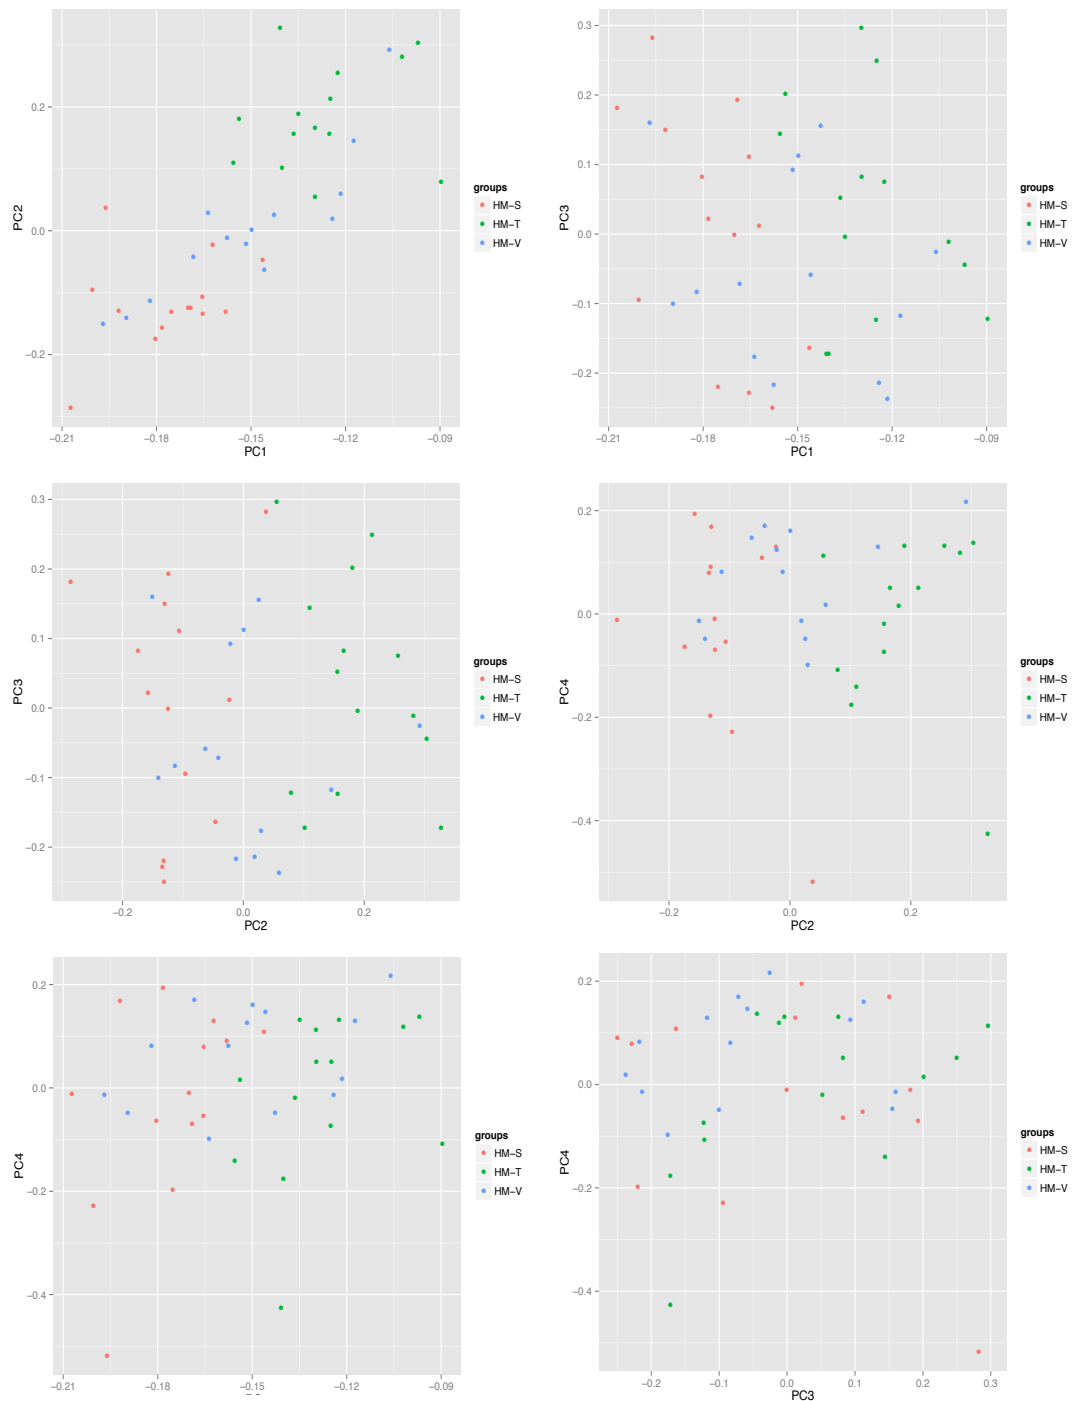

**Figure S2:** principal component analysis of the RPKM values of all genes with a RPKM  $\geq 1$  in at least 90% of the samples. Only biopsies were kept. Principal component 2 (PC2 axis) separates the soleus (HM-S) from the triceps (HM-T) whereas the vastus (HM-V) is spread all over PC2 suggesting the heterogeneous nature of this tissue (mix of type I and type II fibers).

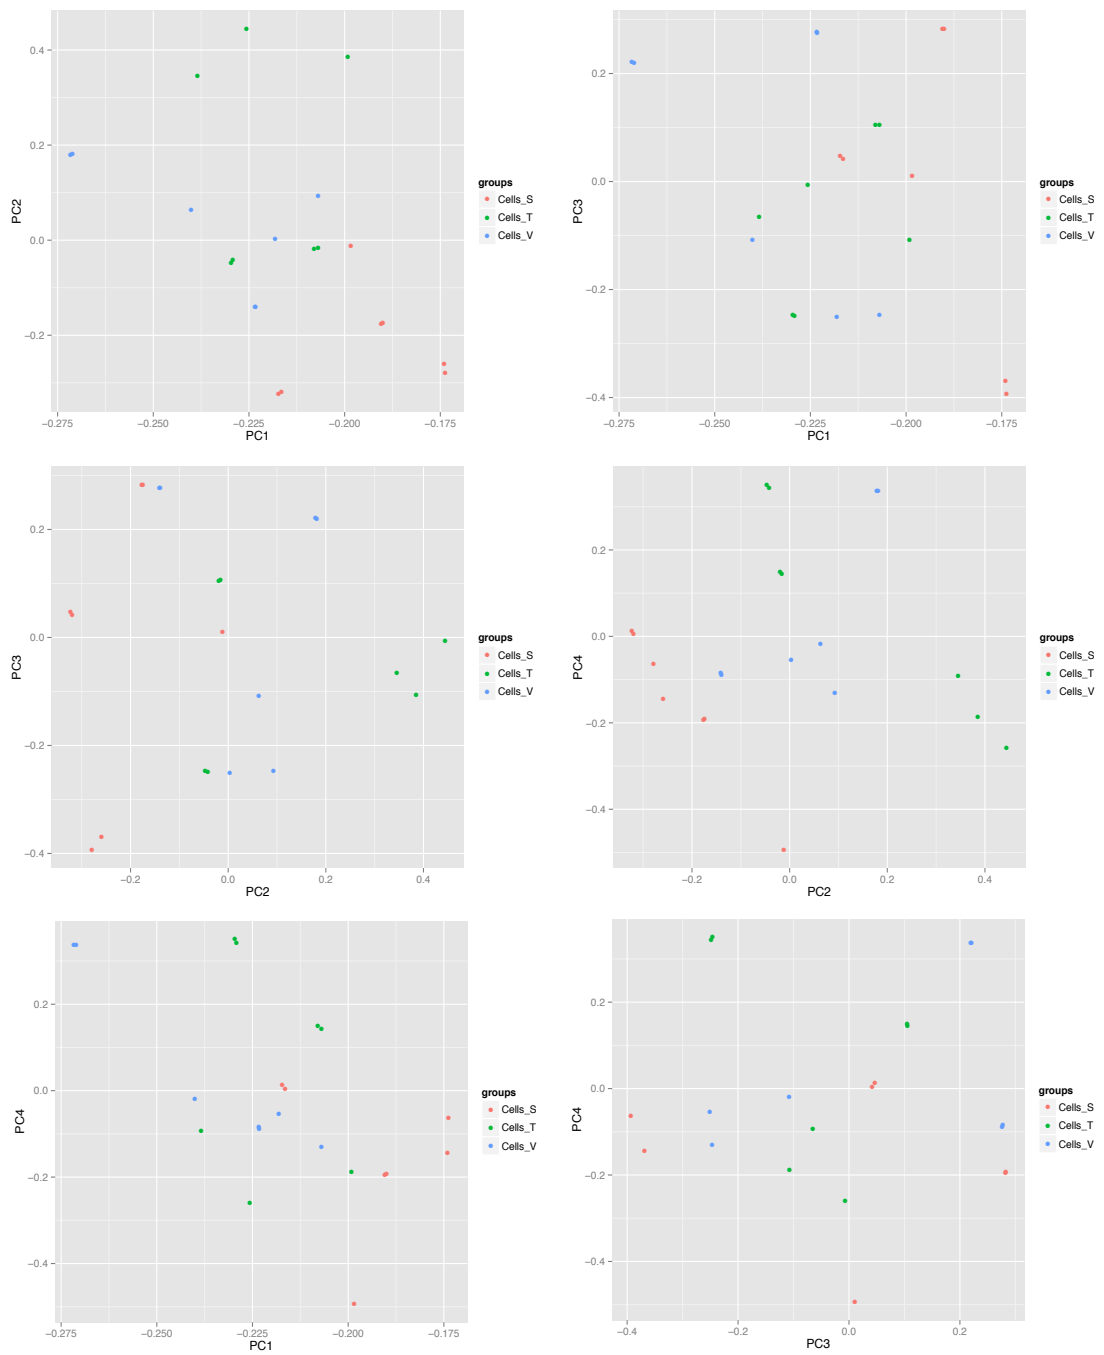

**Figure S3:** principal component analysis of the RPKM values of all genes with an RPKM  $\geq 1$  in at least 90% of the samples. Only myotubes were kept.

**Table S1:** GO terms and KEGG pathways of the the differentially expressed genes in Cells-S versus Cells-T/Biopsies-S versus Biopsies-T (A and D), Cells-T versus Cells –S (B and E) and Biopsies-S versus Biopsies-T (C and F).

**A** Cells-S\_vs\_Cells-T/Biopsies-S\_vs\_Biopsies-T, 864 genes

| GO terms                                                  | stats                                      | adj_pvalue |
|-----------------------------------------------------------|--------------------------------------------|------------|
| organ_development                                         | C=1538;O=167;E=112.45;R=1.49;rawP=1.54e-08 | 2.28E-05   |
| system_development                                        | C=2158;O=220;E=157.79;R=1.39;rawP=8.08e-09 | 2.28E-05   |
| anatomical_structure_development                          | C=2485;O=244;E=181.70;R=1.34;rawP=2.67e-08 | 2.63E-05   |
| developmental_process                                     | C=2782;O=266;E=203.41;R=1.31;rawP=5.38e-08 | 3.98E-05   |
| cell_migration                                            | C=531;O=73;E=38.83;R=1.88;rawP=6.92e-08    | 4.09E-05   |
| localization_of_cell                                      | C=562;O=75;E=41.09;R=1.83;rawP=1.56e-07    | 6.59E-05   |
| cell_motility                                             | C=562;O=75;E=41.09;R=1.83;rawP=1.56e-07    | 6.59E-05   |
| anatomical_structure_morphogenesis                        | C=1331;O=143;E=97.32;R=1.47;rawP=4.63e-07  | 1.00E-04   |
| cellular_component_movement                               | C=754;O=92;E=55.13;R=1.67;rawP=3.84e-07    | 1.00E-04   |
| multicellular_organismal_development                      | C=2475;O=238;E=180.96;R=1.32;rawP=2.99e-07 | 1.00E-04   |
| locomotion                                                | C=752;O=92;E=54.98;R=1.67;rawP=3.40e-07    | 1.00E-04   |
| tissue_development                                        | C=931;O=106;E=68.07;R=1.56;rawP=1.40e-06   | 3.00E-04   |
| regulation_of_developmental_process                       | C=905;O=103;E=66.17;R=1.56;rawP=2.07e-06   | 5.00E-04   |
| multicellular_organismal_process                          | C=3152;O=286;E=230.47;R=1.24;rawP=2.17e-06 | 5.00E-04   |
| single-multicellular_organism_process                     | C=3142;O=284;E=229.73;R=1.24;rawP=3.51e-06 | 7.00E-04   |
| skeletal_system_development                               | C=251;O=39;E=18.35;R=2.13;rawP=5.08e-06    | 9.00E-04   |
| cell_differentiation                                      | C=1568;O=157;E=114.65;R=1.37;rawP=8.45e-06 | 1.30E-03   |
| immune_system_process                                     | C=1012;O=110;E=73.99;R=1.49;rawP=7.90e-06  | 1.30E-03   |
| cellular_developmental_process                            | C=1686;O=167;E=123.28;R=1.35;rawP=7.50e-06 | 1.30E-03   |
| regulation_of_blood_vessel_endothelial_cell_migration     | C=31;O=10;E=2.27;R=4.41;rawP=4.41e-05      | 6.50E-03   |
| cell_fate_commitment                                      | C=112;O=21;E=8.19;R=2.56;rawP=5.13e-05     | 7.20E-03   |
| enzyme_linked_receptor_protein_signaling_pathway          | C=628;O=72;E=45.92;R=1.57;rawP=6.67e-05    | 8.60E-03   |
| single-organism_process                                   | C=4462;O=374;E=326.25;R=1.15;rawP=6.95e-05 | 8.60E-03   |
| actin_cytoskeleton_organization                           | C=310;O=42;E=22.67;R=1.85;rawP=6.68e-05    | 8.60E-03   |
| biological_adhesion                                       | C=533;O=62;E=38.97;R=1.59;rawP=0.0001      | 9.50E-03   |
| skeletal_system_morphogenesis                             | C=118;O=21;E=8.63;R=2.43;rawP=0.0001       | 9.50E-03   |
| blood_vessel_endothelial_cell_migration                   | C=48;O=12;E=3.51;R=3.42;rawP=0.0001        | 9.50E-03   |
| regulation_of_cellular_response_to_growth_factor_stimulus | C=34;O=10;E=2.49;R=4.02;rawP=0.0001        | 9.50E-03   |
| regionalization                                           | C=174;O=27;E=12.72;R=2.12;rawP=0.0001      | 9.50E-03   |
| cell_proliferation                                        | C=990;O=103;E=72.39;R=1.42;rawP=9.87e-05   | 9.50E-03   |
| cell_adhesion                                             | C=532;O=62;E=38.90;R=1.59;rawP=0.0001      | 9.50E-03   |
| negative_regulation_of_phosphorus_metabolic_process       | C=188;O=28;E=13.75;R=2.04;rawP=0.0002      | 1.52E-02   |
| metanephros_development                                   | C=50;O=12;E=3.66;R=3.28;rawP=0.0002        | 1.52E-02   |
| cell_surface_receptor_signaling_pathway                   | C=1364;O=133;E=99.73;R=1.33;rawP=0.0002    | 1.52E-02   |
| organ_morphogenesis                                       | C=487;O=57;E=35.61;R=1.60;rawP=0.0002      | 1.52E-02   |
| connective_tissue_development                             | C=131;O=22;E=9.58;R=2.30;rawP=0.0002       | 1.52E-02   |
| epithelium_development                                    | C=357;O=45;E=26.10;R=1.72;rawP=0.0002      | 1.52E-02   |
| negative_regulation_of_phosphate_metabolic_process        | C=188;O=28;E=13.75;R=2.04;rawP=0.0002      | 1.52E-02   |
| vasculature_development                                   | C=368;O=46;E=26.91;R=1.71;rawP=0.0002      | 1.52E-02   |
| peptide_cross-linking                                     | C=14;O=6;E=1.02;R=5.86;rawP=0.0003         | 2.06E-02   |
| growth_factor_binding                                     | C=79;O=19;E=5.74;R=3.31;rawP=2.52e-06      | 1.40E-03   |
| actin_binding                                             | C=269;O=40;E=19.55;R=2.05;rawP=9.92e-06    | 2.80E-03   |
| cytoskeletal_protein_binding                              | C=482;O=59;E=35.03;R=1.68;rawP=4.29e-05    | 8.10E-03   |
| cell_adhesion_molecule_binding                            | C=35;O=10;E=2.54;R=3.93;rawP=0.0001        | 1.13E-02   |
| calcium_ion_binding                                       | C=350;O=45;E=25.44;R=1.77;rawP=0.0001      | 1.13E-02   |
| extracellular_matrix_binding                              | C=30;O=9;E=2.18;R=4.13;rawP=0.0002         | 1.88E-02   |
| glycosaminoglycan_binding                                 | C=92;O=17;E=6.69;R=2.54;rawP=0.0003        | 2.42E-02   |
| extracellular_region_part                                 | C=482;O=70;E=35.37;R=1.98;rawP=1.79e-08    | 6.75E-06   |
| cell_periphery                                            | C=1999;O=205;E=146.68;R=1.40;rawP=4.59e-08 | 7.72E-06   |
| plasma_membrane                                           | C=1946;O=200;E=142.79;R=1.40;rawP=6.14e-08 | 7.72E-06   |
| extracellular_region                                      | C=815;O=100;E=59.80;R=1.67;rawP=1.14e-07   | 1.07E-05   |
| plasma_membrane_part                                      | C=889;O=102;E=65.23;R=1.56;rawP=2.15e-06   | 2.00E-04   |
| extracellular_space                                       | C=357;O=51;E=26.20;R=1.95;rawP=2.77e-06    | 2.00E-04   |
| extracellular_matrix                                      | C=226;O=37;E=16.58;R=2.23;rawP=2.85e-06    | 2.00E-04   |
| stress_fiber                                              | C=43;O=13;E=3.16;R=4.12;rawP=7.46e-06      | 4.00E-04   |
| proteinaceous_extracellular_matrix                        | C=187;O=31;E=13.72;R=2.26;rawP=1.40e-05    | 5.00E-04   |
| actin_filament_bundle                                     | C=45;O=13;E=3.30;R=3.94;rawP=1.30e-05      | 5.00E-04   |
| actomyosin                                                | C=52;O=14;E=3.82;R=3.67;rawP=1.48e-05      | 5.00E-04   |
| integral_to_plasma_membrane                               | C=496;O=62;E=36.39;R=1.70;rawP=2.00e-05    | 6.00E-04   |
| intrinsic_to_plasma_membrane                              | C=519;O=64;E=38.08;R=1.68;rawP=2.26e-05    | 7.00E-04   |
| cortical_cytoskeleton                                     | C=37;O=11;E=2.71;R=4.05;rawP=4.49e-05      | 1.20E-03   |
| adherens_junction                                         | C=161;O=26;E=11.81;R=2.20;rawP=0.0001      | 2.50E-03   |
| microvillus_membrane                                      | C=9;O=5;E=0.66;R=7.57;rawP=0.0002          | 4.40E-03   |
| microvillus                                               | C=36;O=10;E=2.64;R=3.79;rawP=0.0002        | 4.40E-03   |
| cell_cortex                                               | C=134;O=22;E=9.83;R=2.24;rawP=0.0003       | 5.70E-03   |
| anchoring_junction                                        | C=170;O=26;E=12.47;R=2.08;rawP=0.0003      | 0.0057     |
| cytoplasmic_vesicle_part                                  | C=248;O=34;E=18.20;R=1.87;rawP=0.0003      | 0.0057     |
| cell_cortex_part                                          | C=61;O=13;E=4.48;R=2.90;rawP=0.0004        | 0.0072     |
| Golgi_lumen                                               | C=33;O=9;E=2.42;R=3.72;rawP=0.0005         | 0.0086     |
| membrane                                                  | C=4169;O=348;E=305.90;R=1.14;rawP=0.0006   | 0.0094     |
| cytoplasmic_membrane-bounded_vesicle_lumen                | C=34;O=9;E=2.49;R=3.61;rawP=0.0006         | 0.0094     |
| vesicle_lumen                                             | C=35;O=9;E=2.57;R=3.50;rawP=0.0007         | 0.0106     |
| neuronal_cell_body                                        | C=156;O=23;E=11.45;R=2.01;rawP=0.0010      | 0.0145     |
| lytic_vacuole                                             | C=253;O=32;E=18.56;R=1.72;rawP=0.0017      | 0.0221     |
| lysosome                                                  | C=253;O=32;E=18.56;R=1.72;rawP=0.0017      | 0.0221     |
| cell_body                                                 | C=172;O=24;E=12.62;R=1.90;rawP=0.0017      | 0.0221     |
| secretory_granule_lumen                                   | C=33;O=8;E=2.42;R=3.30;rawP=0.0022         | 0.0266     |
| cell_projection                                           | C=717;O=73;E=52.61;R=1.39;rawP=0.0023      | 0.0266     |
| platelet_alpha_granule                                    | C=41;O=9;E=3.01;R=2.99;rawP=0.0024         | 0.0266     |
| platelet_alpha_granule_lumen                              | C=33;O=8;E=2.42;R=3.30;rawP=0.0022         | 0.0266     |
| cell_surface                                              | C=248;O=31;E=18.20;R=1.70;rawP=0.0024      | 0.0266     |
| cell-substrate_junction                                   | C=119;O=18;E=8.73;R=2.06;rawP=0.0025       | 0.0269     |
| lamellipodium                                             | C=101;O=16;E=7.41;R=2.16;rawP=0.0027       | 0.0283     |
| vesicle_membrane                                          | C=220;O=28;E=16.14;R=1.73;rawP=0.0029      | 0.0295     |
| apical_part_of_cell                                       | C=141;O=20;E=10.35;R=1.93;rawP=0.0033      | 0.0327     |
| cell-substrate_adherens_junction                          | C=114;O=17;E=8.36;R=2.03;rawP=0.0038       | 0.0367     |
| cell_junction                                             | C=427;O=46;E=31.33;R=1.47;rawP=0.0052      | 0.0461     |

B

## Cells-S\_vs\_Cells-T, 2071 genes

| GO terms                                                 | stats                                      | adj_pvalue |
|----------------------------------------------------------|--------------------------------------------|------------|
| multicellular_organismal_process                         | C=2814;O=616;E=485.36;R=1.27;rawP=2.19e-15 | 5.90E-12   |
| single-multicellular_organism_process                    | C=2806;O=614;E=483.98;R=1.27;rawP=2.84e-15 | 5.90E-12   |
| developmental_process                                    | C=2516;O=557;E=433.96;R=1.28;rawP=1.67e-14 | 2.31E-11   |
| multicellular_organismal_development                     | C=2232;O=500;E=384.97;R=1.30;rawP=1.18e-13 | 1.23E-10   |
| anatomical_structure_morphogenesis                       | C=1189;O=297;E=205.08;R=1.45;rawP=1.78e-13 | 1.48E-10   |
| single-organism_process                                  | C=4040;O=820;E=696.82;R=1.18;rawP=7.17e-13 | 4.97E-10   |
| system_development                                       | C=1935;O=439;E=333.75;R=1.32;rawP=1.22e-12 | 7.25E-10   |
| anatomical_structure_development                         | C=2243;O=496;E=386.87;R=1.28;rawP=1.87e-12 | 9.72E-10   |
| cellular_developmental_process                           | C=1514;O=352;E=261.13;R=1.35;rawP=2.27e-11 | 1.05E-08   |
| anatomical_structure_formation_involved_in_morphogenesis | C=928;O=235;E=160.06;R=1.47;rawP=2.68e-11  | 1.11E-08   |
| cell_differentiation                                     | C=1400;O=326;E=241.47;R=1.35;rawP=1.39e-10 | 5.25E-08   |
| organ_morphogenesis                                      | C=436;O=126;E=75.20;R=1.68;rawP=4.16e-10   | 1.44E-07   |
| nervous_system_development                               | C=954;O=235;E=164.55;R=1.43;rawP=4.88e-10  | 1.56E-07   |
| cell_development                                         | C=820;O=207;E=141.43;R=1.46;rawP=7.01e-10  | 2.08E-07   |
| organ_development                                        | C=1380;O=318;E=238.02;R=1.34;rawP=9.31e-10 | 2.58E-07   |
| regulation_of_developmental_process                      | C=810;O=203;E=139.71;R=1.45;rawP=2.04e-09  | 5.30E-07   |
| response_to_wounding                                     | C=570;O=152;E=98.31;R=1.55;rawP=3.48e-09   | 8.51E-07   |
| cellular_component_morphogenesis                         | C=598;O=157;E=103.14;R=1.52;rawP=6.15e-09  | 1.40E-06   |
| extracellular_matrix_organization                        | C=123;O=48;E=21.21;R=2.26;rawP=6.71e-09    | 1.40E-06   |
| extracellular_structure_organization                     | C=123;O=48;E=21.21;R=2.26;rawP=6.71e-09    | 1.40E-06   |
| cell_morphogenesis                                       | C=567;O=150;E=97.80;R=1.53;rawP=8.01e-09   | 1.59E-06   |
| cell_proliferation                                       | C=913;O=221;E=157.47;R=1.40;rawP=9.25e-09  | 1.75E-06   |
| tissue_development                                       | C=833;O=204;E=143.68;R=1.42;rawP=1.43e-08  | 2.59E-06   |
| regulation_of_cell_differentiation                       | C=562;O=146;E=96.93;R=1.51;rawP=4.59e-08   | 7.95E-06   |
| regulation_of_cell_proliferation                         | C=688;O=172;E=118.67;R=1.45;rawP=5.05e-08  | 8.40E-06   |
| positive_regulation_of_cell_differentiation              | C=274;O=82;E=47.26;R=1.74;rawP=1.04e-07    | 1.66E-05   |
| positive_regulation_of_developmental_process             | C=373;O=104;E=64.33;R=1.62;rawP=1.16e-07   | 1.79E-05   |
| locomotion                                               | C=674;O=167;E=116.25;R=1.44;rawP=1.55e-07  | 2.30E-05   |
| localization_of_cell                                     | C=508;O=132;E=87.62;R=1.51;rawP=2.11e-07   | 2.74E-05   |
| cell_motility                                            | C=508;O=132;E=87.62;R=1.51;rawP=2.11e-07   | 2.74E-05   |
| regulation_of_biological_quality                         | C=1342;O=298;E=231.47;R=1.29;rawP=1.99e-07 | 2.74E-05   |
| cellular_component_movement                              | C=676;O=167;E=116.60;R=1.43;rawP=1.91e-07  | 2.74E-05   |
| regulation_of_multicellular_organismal_development       | C=600;O=151;E=103.49;R=1.46;rawP=2.34e-07  | 2.95E-05   |
| regulation_of_localization                               | C=733;O=178;E=126.43;R=1.41;rawP=2.56e-07  | 2.97E-05   |
| skeletal_system_development                              | C=227;O=70;E=39.15;R=1.79;rawP=2.57e-07    | 2.97E-05   |
| positive_regulation_of_cell_proliferation                | C=351;O=98;E=60.54;R=1.62;rawP=2.53e-07    | 2.97E-05   |
| regulation_of_multicellular_organismal_process           | C=914;O=214;E=157.65;R=1.36;rawP=2.81e-07  | 3.16E-05   |
| cell_migration                                           | C=478;O=125;E=82.45;R=1.52;rawP=3.12e-07   | 3.41E-05   |
| cell_adhesion                                            | C=484;O=126;E=83.48;R=1.51;rawP=3.64e-07   | 3.88E-05   |
| biological_adhesion                                      | C=485;O=126;E=83.65;R=1.51;rawP=4.11e-07   | 4.27E-05   |
| transmembrane_signaling_receptor_activity                | C=204;O=63;E=35.11;R=1.79;rawP=8.98e-07    | 3.00E-04   |
| signal_transducer_activity                               | C=458;O=118;E=78.83;R=1.50;rawP=1.39e-06   | 3.00E-04   |
| molecular_transducer_activity                            | C=458;O=118;E=78.83;R=1.50;rawP=1.39e-06   | 3.00E-04   |
| receptor_activity                                        | C=343;O=95;E=59.03;R=1.61;rawP=5.26e-07    | 3.00E-04   |
| signaling_receptor_activity                              | C=248;O=69;E=42.68;R=1.62;rawP=1.63e-05    | 2.60E-03   |
| G-protein_coupled_receptor_activity                      | C=69;O=26;E=11.88;R=2.19;rawP=3.84e-05     | 5.20E-03   |
| receptor_binding                                         | C=600;O=136;E=103.27;R=1.32;rawP=0.0002    | 2.31E-02   |
| amino_acid_transmembrane_transporter_activity            | C=35;O=15;E=6.02;R=2.49;rawP=0.0003        | 2.43E-02   |
| protease_binding                                         | C=35;O=15;E=6.02;R=2.49;rawP=0.0003        | 2.43E-02   |
| 3',5'-cyclic-nucleotide_phosphodiesterase_activity       | C=10;O=7;E=1.72;R=4.07;rawP=0.0003         | 2.43E-02   |
| lipid_binding                                            | C=408;O=95;E=70.22;R=1.35;rawP=0.0008      | 4.98E-02   |
| neutral_amino_acid_transmembrane_transporter_activity    | C=14;O=8;E=2.41;R=3.32;rawP=0.0008         | 4.98E-02   |
| cyclic-nucleotide_phosphodiesterase_activity             | C=11;O=7;E=1.89;R=3.70;rawP=0.0008         | 4.98E-02   |
| extracellular_region                                     | C=707;O=218;E=121.89;R=1.79;rawP=1.46e-20  | 6.88E-18   |
| extracellular_region_part                                | C=416;O=128;E=71.72;R=1.78;rawP=2.93e-12   | 6.90E-10   |
| proteinaceous_extracellular_matrix                       | C=164;O=62;E=28.27;R=2.19;rawP=2.02e-10    | 3.17E-08   |
| intrinsic_to_membrane                                    | C=2210;O=477;E=381.01;R=1.25;rawP=7.28e-10 | 8.57E-08   |
| cell_periphery                                           | C=1771;O=391;E=305.32;R=1.28;rawP=2.94e-09 | 2.77E-07   |
| extracellular_matrix                                     | C=199;O=68;E=34.31;R=1.98;rawP=4.13e-09    | 3.24E-07   |
| plasma_membrane                                          | C=1722;O=380;E=296.88;R=1.28;rawP=5.80e-09 | 3.90E-07   |
| integral_to_membrane                                     | C=2176;O=464;E=375.15;R=1.24;rawP=8.90e-09 | 4.66E-07   |
| extracellular_space                                      | C=303;O=92;E=52.24;R=1.76;rawP=8.04e-09    | 4.66E-07   |
| extracellular_matrix_part                                | C=92;O=38;E=15.86;R=2.40;rawP=4.25e-08     | 2.00E-06   |
| plasma_membrane_part                                     | C=759;O=185;E=130.85;R=1.41;rawP=1.19e-07  | 5.10E-06   |
| membrane                                                 | C=3791;O=743;E=653.58;R=1.14;rawP=3.47e-07 | 1.36E-05   |
| intrinsic_to_plasma_membrane                             | C=434;O=115;E=74.82;R=1.54;rawP=4.81e-07   | 1.74E-05   |
| membrane_part                                            | C=2697;O=546;E=464.97;R=1.17;rawP=6.98e-07 | 2.35E-05   |
| integral_to_plasma_membrane                              | C=415;O=108;E=71.55;R=1.51;rawP=2.72e-06   | 8.54E-05   |
| collagen                                                 | C=37;O=16;E=6.38;R=2.51;rawP=0.0002        | 0.0059     |
| membrane_raft                                            | C=120;O=36;E=20.69;R=1.74;rawP=0.0004      | 0.0111     |
| endoplasmic_reticulum_lumen                              | C=106;O=32;E=18.27;R=1.75;rawP=0.0007      | 0.0183     |
| cell_projection                                          | C=660;O=144;E=113.79;R=1.27;rawP=0.0010    | 0.0248     |
| cell_junction                                            | C=379;O=88;E=65.34;R=1.35;rawP=0.0015      | 0.0336     |
| basement_membrane                                        | C=51;O=18;E=8.79;R=2.05;rawP=0.0015        | 0.0336     |
| axon                                                     | C=137;O=37;E=23.62;R=1.57;rawP=0.0026      | 0.049      |
| caecula                                                  | C=45;O=16;E=7.76;R=2.06;rawP=0.0024        | 0.049      |
| Golgi_stack                                              | C=87;O=26;E=15.00;R=1.73;rawP=0.0025       | 0.049      |
| microfibril                                              | C=7;O=5;E=1.21;R=4.14;rawP=0.0023          | 0.049      |

## C

## Biopsies-S\_vs\_Biopsies-T, 3725 genes

| GO terms                                                       | stats                                        | adj_pvalue |
|----------------------------------------------------------------|----------------------------------------------|------------|
| cellular_respiration                                           | C=136;O=103;E=48.48;R=2.12;rawP=7.28e-22     | 3.65E-18   |
| respiratory_electron_transport_chain                           | C=96;O=78;E=34.22;R=2.28;rawP=3.60e-20       | 9.02E-17   |
| energy_derivation_by_oxidation_of_organic_compounds            | C=233;O=147;E=83.06;R=1.77;rawP=4.65e-18     | 7.76E-15   |
| generation_of_precursor_metabolites_and_energy                 | C=311;O=182;E=110.87;R=1.64;rawP=4.06e-17    | 5.08E-14   |
| oxidation-reduction_process                                    | C=370;O=208;E=131.90;R=1.58;rawP=1.02e-16    | 9.60E-14   |
| electron_transport_chain                                       | C=118;O=86;E=42.07;R=2.04;rawP=1.15e-16      | 9.60E-14   |
| mitochondrial_ATP_synthesis_coupled_electron_transport         | C=47;O=37;E=16.76;R=2.21;rawP=1.74e-09       | 1.09E-06   |
| ATP_synthesis_coupled_electron_transport                       | C=47;O=37;E=16.76;R=2.21;rawP=1.74e-09       | 1.09E-06   |
| acetyl-CoA_metabolic_process                                   | C=41;O=33;E=14.62;R=2.26;rawP=4.81e-09       | 2.44E-06   |
| oxidative_phosphorylation                                      | C=57;O=42;E=20.32;R=2.07;rawP=4.88e-09       | 2.44E-06   |
| homophilic_cell_adhesion                                       | C=37;O=30;E=13.19;R=2.27;rawP=1.80e-08       | 8.20E-06   |
| mitochondrial_electron_transport_NADH_to_ubiquinone            | C=36;O=29;E=12.83;R=2.26;rawP=4.13e-08       | 1.72E-05   |
| aerobic_respiration                                            | C=38;O=30;E=13.55;R=2.21;rawP=5.62e-08       | 2.17E-05   |
| small_molecule_metabolic_process                               | C=1435;O=598;E=511.57;R=1.17;rawP=7.74e-08   | 2.77E-05   |
| cofactor_catabolic_process                                     | C=32;O=26;E=11.41;R=2.28;rawP=1.55e-07       | 5.18E-05   |
| tricarboxylic_acid_cycle                                       | C=24;O=21;E=8.56;R=2.45;rawP=2.18e-07        | 6.82E-05   |
| muscle_system_process                                          | C=182;O=98;E=64.88;R=1.51;rawP=2.93e-07      | 8.63E-05   |
| catabolic_process                                              | C=1301;O=542;E=463.80;R=1.17;rawP=4.22e-07   | 1.00E-04   |
| striated_muscle_contraction                                    | C=62;O=41;E=22.10;R=1.85;rawP=9.32e-07       | 2.00E-04   |
| organic_substance_catabolic_process                            | C=1207;O=504;E=430.29;R=1.17;rawP=8.82e-07   | 2.00E-04   |
| acetyl-CoA_catabolic_process                                   | C=25;O=21;E=8.91;R=2.36;rawP=9.03e-07        | 2.00E-04   |
| actin-myosin_filament_sliding                                  | C=34;O=26;E=12.12;R=2.15;rawP=1.35e-06       | 2.00E-04   |
| translational_termination                                      | C=88;O=54;E=31.37;R=1.72;rawP=7.02e-07       | 2.00E-04   |
| translational_elongation                                       | C=104;O=61;E=37.08;R=1.65;rawP=1.25e-06      | 2.00E-04   |
| organic_acid_catabolic_process                                 | C=121;O=69;E=43.14;R=1.60;rawP=1.10e-06      | 2.00E-04   |
| muscle_filament_sliding                                        | C=34;O=26;E=12.12;R=2.15;rawP=1.35e-06       | 2.00E-04   |
| carboxylic_acid_catabolic_process                              | C=121;O=69;E=43.14;R=1.60;rawP=1.10e-06      | 2.00E-04   |
| muscle_contraction                                             | C=156;O=85;E=55.61;R=1.53;rawP=9.29e-07      | 2.00E-04   |
| coenzyme_catabolic_process                                     | C=28;O=23;E=9.98;R=2.30;rawP=5.79e-07        | 2.00E-04   |
| protein_complex_subunit_organization                           | C=567;O=255;E=202.13;R=1.26;rawP=1.19e-06    | 2.00E-04   |
| skeletal_muscle_contraction                                    | C=19;O=17;E=6.77;R=2.51;rawP=1.77e-06        | 3.00E-04   |
| protein_complex_disassembly                                    | C=122;O=69;E=43.49;R=1.59;rawP=1.65e-06      | 3.00E-04   |
| cellular_protein_complex_disassembly                           | C=119;O=67;E=42.42;R=1.58;rawP=2.90e-06      | 4.00E-04   |
| acyl-CoA_metabolic_process                                     | C=64;O=41;E=22.82;R=1.80;rawP=3.21e-06       | 5.00E-04   |
| thioester_metabolic_process                                    | C=64;O=41;E=22.82;R=1.80;rawP=3.21e-06       | 5.00E-04   |
| translational_initiation                                       | C=140;O=76;E=49.91;R=1.52;rawP=4.19e-06      | 6.00E-04   |
| cellular_catabolic_process                                     | C=1145;O=473;E=408.18;R=1.16;rawP=8.92e-06   | 1.20E-03   |
| single-organism_catabolic_process                              | C=149;O=79;E=53.12;R=1.49;rawP=8.92e-06      | 1.20E-03   |
| small_molecule_catabolic_process                               | C=148;O=78;E=52.76;R=1.48;rawP=1.35e-05      | 1.70E-03   |
| protein_targeting_to_membrane                                  | C=133;O=71;E=47.41;R=1.50;rawP=1.85e-05      | 2.30E-03   |
| oxidoreductase_activity                                        | C=391;O=204;E=139.29;R=1.46;rawP=4.56e-12    | 5.34E-09   |
| structural_constituent_of_ribosome                             | C=147;O=86;E=52.37;R=1.64;rawP=9.76e-09      | 5.71E-06   |
| NADH_dehydrogenase_(quinone)_activity                          | C=37;O=29;E=13.18;R=2.20;rawP=1.24e-07       | 2.90E-05   |
| NADH_dehydrogenase_activity                                    | C=37;O=29;E=13.18;R=2.20;rawP=1.24e-07       | 2.90E-05   |
| NADH_dehydrogenase_(ubiquinone)_activity                       | C=37;O=29;E=13.18;R=2.20;rawP=1.24e-07       | 2.90E-05   |
| cofactor_binding                                               | C=155;O=83;E=55.22;R=1.50;rawP=3.08e-06      | 5.00E-04   |
| oxidoreductase_activity_acting_on_NADH_or_NADPH_quinone        | C=46;O=32;E=16.39;R=1.95;rawP=2.75e-06       | 5.00E-04   |
| inorganic_cation_transmembrane_transporter_activity            | C=171;O=90;E=60.92;R=1.48;rawP=3.13e-06      | 5.00E-04   |
| ion_transmembrane_transporter_activity                         | C=284;O=137;E=101.17;R=1.35;rawP=5.78e-06    | 8.00E-04   |
| hydrogen_ion_transmembrane_transporter_activity                | C=70;O=43;E=24.94;R=1.72;rawP=8.97e-06       | 1.00E-03   |
| structural_molecule_activity                                   | C=357;O=165;E=127.18;R=1.30;rawP=1.56e-05    | 1.70E-03   |
| transmembrane_transporter_activity                             | C=339;O=156;E=120.77;R=1.29;rawP=3.55e-05    | 2.80E-03   |
| acyl-CoA_dehydrogenase_activity                                | C=13;O=12;E=4.63;R=2.59;rawP=3.59e-05        | 2.80E-03   |
| coenzyme_binding                                               | C=114;O=62;E=40.61;R=1.53;rawP=2.87e-05      | 0.0028     |
| substrate-specific_transmembrane_transporter_activity          | C=319;O=148;E=113.64;R=1.30;rawP=3.38e-05    | 0.0028     |
| monovalent_inorganic_cation_transmembrane_transporter_activity | C=115;O=62;E=40.97;R=1.51;rawP=4.09e-05      | 0.003      |
| cation_transmembrane_transporter_activity                      | C=211;O=103;E=75.17;R=1.37;rawP=4.53e-05     | 0.0031     |
| oxidoreductase_activity_acting_on_the_CH-CH_group_of_donor     | C=41;O=27;E=14.61;R=1.85;rawP=7.62e-05       | 0.005      |
| oxidoreductase_activity_acting_on_NADH_or_NADPH                | C=65;O=38;E=23.16;R=1.64;rawP=0.0001         | 0.0062     |
| NAD_binding                                                    | C=37;O=24;E=13.18;R=1.82;rawP=0.0003         | 0.0175     |
| flavin_adenine_dinucleotide_binding                            | C=42;O=26;E=14.96;R=1.74;rawP=0.0005         | 0.0279     |
| mitochondrial_part                                             | C=586;O=322;E=207.58;R=1.55;rawP=9.02e-24    | 5.88E-21   |
| mitochondrial_inner_membrane                                   | C=278;O=178;E=98.47;R=1.81;rawP=5.23e-23     | 1.70E-20   |
| organelle_inner_membrane                                       | C=300;O=182;E=106.27;R=1.71;rawP=1.06e-19    | 1.73E-17   |
| mitochondrial_membrane                                         | C=388;O=223;E=137.44;R=1.62;rawP=9.37e-20    | 1.73E-17   |
| mitochondrial_envelope                                         | C=406;O=230;E=143.82;R=1.60;rawP=2.85e-19    | 3.72E-17   |
| mitochondrion                                                  | C=1156;O=543;E=409.48;R=1.33;rawP=1.44e-18   | 1.56E-16   |
| mitochondrial_membrane_part                                    | C=121;O=84;E=42.86;R=1.96;rawP=1.88e-14      | 1.75E-12   |
| mitochondrial_matrix                                           | C=237;O=136;E=83.95;R=1.62;rawP=2.20e-12     | 1.79E-10   |
| respiratory_chain                                              | C=65;O=50;E=23.02;R=2.17;rawP=8.33e-12       | 6.03E-10   |
| organelle_envelope                                             | C=600;O=290;E=212.53;R=1.36;rawP=9.80e-12    | 6.39E-10   |
| mitochondrial_respiratory_chain                                | C=60;O=47;E=21.25;R=2.21;rawP=1.12e-11       | 6.64E-10   |
| envelope                                                       | C=601;O=290;E=212.89;R=1.36;rawP=1.25e-11    | 6.79E-10   |
| mitochondrial_respiratory_chain_complex_I                      | C=39;O=32;E=13.81;R=2.32;rawP=2.81e-09       | 1.22E-07   |
| respiratory_chain_complex_I                                    | C=39;O=32;E=13.81;R=2.32;rawP=2.81e-09       | 1.22E-07   |
| NADH_dehydrogenase_complex                                     | C=39;O=32;E=13.81;R=2.32;rawP=2.81e-09       | 1.22E-07   |
| ribosomal_subunit                                              | C=128;O=76;E=45.34;R=1.68;rawP=2.27e-08      | 9.25E-07   |
| ribosome                                                       | C=189;O=103;E=66.95;R=1.54;rawP=4.64e-08     | 1.78E-06   |
| cytosolic_ribosome                                             | C=86;O=53;E=30.46;R=1.74;rawP=5.90e-07       | 2.14E-05   |
| cytosolic_part                                                 | C=158;O=84;E=55.97;R=1.50;rawP=3.09e-06      | 0.0001     |
| contractile_fiber_part                                         | C=120;O=67;E=42.51;R=1.58;rawP=3.39e-06      | 0.0001     |
| cytoplasmic_part                                               | C=4185;O=1573;E=1482.43;R=1.06;rawP=1.12e-05 | 0.0003     |
| contractile_fiber                                              | C=133;O=71;E=47.11;R=1.51;rawP=1.47e-05      | 0.0004     |
| myofibril                                                      | C=124;O=67;E=43.92;R=1.53;rawP=1.51e-05      | 0.0004     |
| striated_muscle_thin_filament                                  | C=13;O=12;E=4.60;R=2.61;rawP=3.37e-05        | 0.0009     |
| sarcomere                                                      | C=105;O=57;E=37.19;R=1.53;rawP=5.37e-05      | 0.0013     |
| small_ribosomal_subunit                                        | C=59;O=36;E=20.90;R=1.72;rawP=5.15e-05       | 0.0013     |
| cytosolic_large_ribosomal_subunit                              | C=49;O=31;E=17.36;R=1.79;rawP=6.36e-05       | 0.0015     |
| cytoplasm                                                      | C=5398;O=1988;E=1912.10;R=1.04;rawP=6.94e-05 | 0.0016     |
| mitochondrial_proton-transporting_ATP_synthase_complex         | C=19;O=15;E=6.73;R=2.23;rawP=0.0001          | 0.0022     |
| large_ribosomal_subunit                                        | C=70;O=40;E=24.80;R=1.61;rawP=0.0002         | 0.0042     |
| sarcoplasm                                                     | C=49;O=30;E=17.36;R=1.73;rawP=0.0002         | 0.0042     |
| proton-transporting_ATP_synthase_complex                       | C=20;O=15;E=7.08;R=2.12;rawP=0.0004          | 0.0082     |
| membrane_part                                                  | C=2301;O=878;E=815.07;R=1.08;rawP=0.0006     | 0.0115     |
| sarcoplasmic_reticulum                                         | C=45;O=27;E=15.94;R=1.69;rawP=0.0006         | 0.0115     |
| troponin_complex                                               | C=7;O=7;E=2.48;R=2.82;rawP=0.0007            | 0.013      |
| cytosolic_small_ribosomal_subunit                              | C=35;O=22;E=12.40;R=1.77;rawP=0.0008         | 0.0141     |
| membrane                                                       | C=3251;O=1218;E=1151.58;R=1.06;rawP=0.0008   | 0.0141     |
| ion_channel_complex                                            | C=46;O=27;E=16.29;R=1.66;rawP=0.0010         | 0.0172     |
| T-tubule                                                       | C=18;O=13;E=6.38;R=2.04;rawP=0.0016          | 0.0254     |
| mitochondrial_nucleoid                                         | C=32;O=20;E=11.34;R=1.76;rawP=0.0016         | 0.0254     |

**D Cells-S\_vs\_Cells-T/Biopsies-S\_vs\_Biopsies-T, 864 genes**

| KEGG pathway                          | stats                                   | adj_pvalue |
|---------------------------------------|-----------------------------------------|------------|
| Regulation_of_actin_cytoskeleton      | C=154;O=26;E=10.55;R=2.46;rawP=1.56e-05 | 2.20E-03   |
| Focal_adhesion                        | C=158;O=24;E=10.82;R=2.22;rawP=0.0002   | 1.06E-02   |
| Pathogenic_Escherichia_coli_infection | C=40;O=10;E=2.74;R=3.65;rawP=0.0003     | 1.06E-02   |
| Leukocyte_transendothelial_migration  | C=71;O=14;E=4.86;R=2.88;rawP=0.0003     | 1.06E-02   |

**E Cells-S\_vs\_Cells-T, 2071 genes**

| KEGG pathway                           | stats                                  | adj_pvalue |
|----------------------------------------|----------------------------------------|------------|
| Protein_digestion_and_absorption       | C=32;O=17;E=5.37;R=3.17;rawP=2.71e-06  | 5.00E-04   |
| Cytokine-cytokine_receptor_interaction | C=68;O=25;E=11.40;R=2.19;rawP=5.65e-05 | 5.50E-03   |
| ECM-receptor_interaction               | C=51;O=19;E=8.55;R=2.22;rawP=0.0004    | 0.0241     |
| Focal_adhesion                         | C=143;O=40;E=23.98;R=1.67;rawP=0.0005  | 0.0241     |
| Nitrogen_metabolism                    | C=9;O=6;E=1.51;R=3.98;rawP=0.0012      | 0.0386     |
| Gap_junction                           | C=55;O=19;E=9.22;R=2.06;rawP=0.0010    | 0.0386     |
| Amoebiasis                             | C=57;O=19;E=9.56;R=1.99;rawP=0.0017    | 0.041      |
| Pathways_in_cancer                     | C=219;O=54;E=36.73;R=1.47;rawP=0.0017  | 0.041      |

**F Biopsies-S\_vs\_Biopsies-T, 3725 genes**

| KEGG pathway                               | stats                                     | adj_pvalue |
|--------------------------------------------|-------------------------------------------|------------|
| Oxidative_phosphorylation                  | C=104;O=76;E=36.63;R=2.08;rawP=2.89e-15   | 6.10E-13   |
| Alzheimer's_disease                        | C=131;O=89;E=46.13;R=1.93;rawP=1.73e-14   | 1.83E-12   |
| Parkinson's_disease                        | C=102;O=73;E=35.92;R=2.03;rawP=6.18e-14   | 4.35E-12   |
| Huntington's_disease                       | C=139;O=84;E=48.95;R=1.72;rawP=9.38e-10   | 4.95E-08   |
| Cardiac_muscle_contraction                 | C=48;O=36;E=16.90;R=2.13;rawP=2.04e-08    | 8.61E-07   |
| Valine,_leucine_and_isoleucine_degradation | C=37;O=29;E=13.03;R=2.23;rawP=9.44e-08    | 2.85E-06   |
| Ribosome                                   | C=85;O=54;E=29.93;R=1.80;rawP=8.84e-08    | 2.85E-06   |
| Metabolic_pathways                         | C=645;O=287;E=227.15;R=1.26;rawP=2.85e-07 | 7.52E-06   |
| Citrate_cycle_(TCA_cycle)                  | C=26;O=21;E=9.16;R=2.29;rawP=2.50e-06     | 5.86E-05   |
| Calcium_signaling_pathway                  | C=66;O=41;E=23.24;R=1.76;rawP=7.18e-06    | 0.0002     |
| Propanoate_metabolism                      | C=25;O=19;E=8.80;R=2.16;rawP=3.71e-05     | 0.0007     |
| Fatty_acid_metabolism                      | C=31;O=22;E=10.92;R=2.02;rawP=5.29e-05    | 0.0009     |
| Glycolysis/_Gluconeogenesis                | C=37;O=25;E=13.03;R=1.92;rawP=6.03e-05    | 0.001      |
| Pyruvate_metabolism                        | C=30;O=19;E=10.57;R=1.80;rawP=0.0015      | 0.0226     |
| Tight_junction                             | C=80;O=41;E=28.17;R=1.46;rawP=0.0023      | 0.0324     |



**Table S2:** Cytokine assay of the CM of SKMC-S and SKMC-T cells in control conditions of after 24h TNF-alpha treatment.

| Cytokine          | C-SKMC-S-CM                         |         | C-SKMC-T-CM                         |         | TNF-SKMC-S-CM                       |         | TNF-SKMC-T-CM                       |         |
|-------------------|-------------------------------------|---------|-------------------------------------|---------|-------------------------------------|---------|-------------------------------------|---------|
|                   | Protein level<br>(fold C-SKMC-S-CM) | ESM (±) | Protein level<br>(fold C-SKMC-S-CM) | ESM (±) | Protein level<br>(fold C-SKMC-S-CM) | ESM (±) | Protein level<br>(fold C-SKMC-S-CM) | ESM (±) |
| <i>Angiogenin</i> | 1.00                                | 0.22    | 4.92                                | 1.54    | 1.30                                | 0.28    | 3.17                                | 1.05    |
| <i>Acrp30</i>     | 1.00                                | 0.31    | 1.06                                | 0.16    | 1.02                                | 0.12    | 1.20                                | 0.13    |
| <i>AgRP</i>       | 1.00                                | 0.25    | 1.04                                | 0.21    | 1.01                                | 0.21    | 1.15                                | 0.13    |
| <i>ANGPT2</i>     | 1.00                                | 0.23    | 1.00                                | 0.18    | 1.06                                | 0.17    | 1.21                                | 0.07    |
| <i>AREG</i>       | 1.00                                | 0.22    | 0.97                                | 0.22    | 0.98                                | 0.22    | 0.99                                | 0.18    |
| <i>Axl</i>        | 1.00                                | 0.23    | 1.03                                | 0.17    | 0.98                                | 0.19    | 1.10                                | 0.11    |
| <i>b-NGF</i>      | 1.00                                | 0.17    | 1.03                                | 0.17    | 1.05                                | 0.35    | 1.13                                | 0.12    |
| <i>BDNF</i>       | 1.00                                | 0.18    | 0.84                                | 0.07    | 0.96                                | 0.07    | 0.99                                | 0.06    |
| <i>bFGF</i>       | 1.00                                | 0.26    | 1.00                                | 0.15    | 1.02                                | 0.20    | 1.15                                | 0.09    |
| <i>BLC</i>        | 1.00                                | 0.15    | 0.90                                | 0.07    | 1.04                                | 0.07    | 1.08                                | 0.12    |
| <i>BMP-4</i>      | 1.00                                | 0.12    | 0.97                                | 0.05    | 1.09                                | 0.09    | 1.19                                | 0.11    |
| <i>BMP-6</i>      | 1.00                                | 0.16    | 0.89                                | 0.14    | 1.13                                | 0.08    | 1.16                                | 0.06    |
| <i>BTC</i>        | 1.00                                | 0.27    | 1.03                                | 0.21    | 0.98                                | 0.14    | 1.21                                | 0.12    |
| <i>CCL11</i>      | 1.00                                | 0.17    | 1.04                                | 0.27    | 1.19                                | 0.29    | 2.11                                | 0.70    |
| <i>CCL24</i>      | 1.00                                | 0.12    | 0.89                                | 0.09    | 1.05                                | 0.06    | 1.17                                | 0.10    |
| <i>CCL26</i>      | 1.00                                | 0.13    | 0.98                                | 0.10    | 1.14                                | 0.08    | 1.21                                | 0.10    |
| <i>CCL28</i>      | 1.00                                | 0.21    | 1.09                                | 0.23    | 1.05                                | 0.25    | 1.12                                | 0.10    |
| <i>CKB 8-1</i>    | 1.00                                | 0.15    | 0.94                                | 0.06    | 1.06                                | 0.07    | 1.23                                | 0.11    |
| <i>CNTF</i>       | 1.00                                | 0.14    | 0.92                                | 0.08    | 1.11                                | 0.08    | 1.17                                | 0.10    |
| <i>CSF2</i>       | 1.00                                | 0.19    | 1.09                                | 0.27    | 1.55                                | 0.27    | 1.54                                | 0.41    |
| <i>CSF3</i>       | 1.00                                | 0.28    | 1.00                                | 0.22    | 1.06                                | 0.30    | 1.18                                | 0.23    |
| <i>CTACK</i>      | 1.00                                | 0.22    | 0.95                                | 0.22    | 0.92                                | 0.21    | 1.21                                | 0.13    |
| <i>CX3CL1</i>     | 1.00                                | 0.17    | 0.93                                | 0.08    | 1.05                                | 0.06    | 1.18                                | 0.10    |
| <i>Dtk</i>        | 1.00                                | 0.21    | 0.95                                | 0.21    | 0.93                                | 0.14    | 1.16                                | 0.06    |
| <i>EGF</i>        | 1.00                                | 0.16    | 0.92                                | 0.05    | 1.06                                | 0.06    | 1.18                                | 0.09    |
| <i>EGFR</i>       | 1.00                                | 0.22    | 1.05                                | 0.15    | 0.95                                | 0.13    | 1.17                                | 0.11    |
| <i>ENA-78</i>     | 1.00                                | 0.23    | 1.13                                | 0.32    | 1.17                                | 0.41    | 2.63                                | 1.01    |
| <i>Fas</i>        | 1.00                                | 0.38    | 1.09                                | 0.35    | 1.23                                | 0.48    | 1.12                                | 0.31    |
| <i>FGF4</i>       | 1.00                                | 0.25    | 0.97                                | 0.19    | 0.95                                | 0.25    | 1.12                                | 0.12    |
| <i>FGF6</i>       | 1.00                                | 0.14    | 0.98                                | 0.10    | 1.10                                | 0.07    | 1.13                                | 0.13    |
| <i>FGF7</i>       | 1.00                                | 0.15    | 0.89                                | 0.08    | 1.00                                | 0.08    | 1.13                                | 0.09    |
| <i>FGF9</i>       | 1.00                                | 0.19    | 0.93                                | 0.22    | 1.01                                | 0.20    | 1.04                                | 0.10    |
| <i>Fit-3L</i>     | 1.00                                | 0.15    | 0.96                                | 0.10    | 1.06                                | 0.06    | 1.20                                | 0.12    |
| <i>GCP-2</i>      | 1.00                                | 0.16    | 0.99                                | 0.05    | 1.10                                | 0.08    | 1.12                                | 0.11    |
| <i>GDNF</i>       | 1.00                                | 0.17    | 0.95                                | 0.07    | 1.16                                | 0.10    | 1.24                                | 0.10    |
| <i>GITR</i>       | 1.00                                | 0.18    | 0.87                                | 0.14    | 0.87                                | 0.21    | 1.04                                | 0.11    |
| <i>GITRL</i>      | 1.00                                | 0.21    | 0.99                                | 0.18    | 0.93                                | 0.08    | 1.06                                | 0.09    |
| <i>GRO</i>        | 1.00                                | 0.20    | 1.71                                | 0.79    | 9.12                                | 5.16    | 19.09                               | 10.13   |
| <i>GRO-α</i>      | 1.00                                | 0.24    | 1.06                                | 0.25    | 1.10                                | 0.35    | 1.22                                | 0.23    |
| <i>HCC-4</i>      | 1.00                                | 0.16    | 0.96                                | 0.17    | 0.97                                | 0.20    | 1.12                                | 0.12    |
| <i>HGF</i>        | 1.00                                | 0.24    | 1.26                                | 0.28    | 0.97                                | 0.13    | 1.11                                | 0.16    |
| <i>I-309</i>      | 1.00                                | 0.15    | 0.94                                | 0.07    | 1.04                                | 0.06    | 1.13                                | 0.05    |
| <i>I-TAC</i>      | 1.00                                | 0.24    | 0.94                                | 0.23    | 1.35                                | 0.46    | 1.13                                | 0.17    |
| <i>ICAM1</i>      | 1.00                                | 0.26    | 1.04                                | 0.18    | 0.98                                | 0.19    | 1.17                                | 0.09    |
| <i>ICAM3</i>      | 1.00                                | 0.20    | 0.94                                | 0.13    | 0.86                                | 0.13    | 1.01                                | 0.08    |
| <i>IFN-γ</i>      | 1.00                                | 0.20    | 0.94                                | 0.31    | 1.14                                | 0.27    | 1.21                                | 0.33    |
| <i>IGF-1</i>      | 1.00                                | 0.15    | 0.91                                | 0.09    | 1.04                                | 0.10    | 1.21                                | 0.08    |
| <i>IGFBP1</i>     | 1.00                                | 0.16    | 0.92                                | 0.04    | 1.01                                | 0.04    | 1.16                                | 0.12    |
| <i>IGFBP2</i>     | 1.00                                | 0.19    | 0.91                                | 0.07    | 1.12                                | 0.16    | 1.13                                | 0.08    |
| <i>IGFBP4</i>     | 1.00                                | 0.16    | 0.99                                | 0.08    | 1.12                                | 0.09    | 1.22                                | 0.09    |
| <i>IGFBP6</i>     | 1.00                                | 0.22    | 2.00                                | 0.60    | 1.23                                | 0.40    | 1.77                                | 0.56    |
| <i>IGFBP3</i>     | 1.00                                | 0.21    | 1.02                                | 0.13    | 0.90                                | 0.16    | 1.11                                | 0.12    |
| <i>IL-1 R1</i>    | 1.00                                | 0.25    | 0.93                                | 0.22    | 1.05                                | 0.12    | 1.11                                | 0.11    |
| <i>IL-10</i>      | 1.00                                | 0.14    | 0.93                                | 0.11    | 1.11                                | 0.08    | 1.21                                | 0.10    |
| <i>IL-11</i>      | 1.00                                | 0.27    | 0.83                                | 0.20    | 0.90                                | 0.13    | 0.92                                | 0.13    |

| Cytokine         | C-SKMC-S-CM                         |         | C-SKMC-T-CM                         |         | TNF-SKMC-S-CM                       |         | TNF-SKMC-T-CM                       |         |
|------------------|-------------------------------------|---------|-------------------------------------|---------|-------------------------------------|---------|-------------------------------------|---------|
|                  | Protein level<br>(fold C-SKMC-S-CM) | ESM (±) | Protein level<br>(fold C-SKMC-S-CM) | ESM (±) | Protein level<br>(fold C-SKMC-S-CM) | ESM (±) | Protein level<br>(fold C-SKMC-S-CM) | ESM (±) |
| <i>IL-12 p40</i> | 1.00                                | 0.17    | 1.05                                | 0.16    | 0.96                                | 0.18    | 1.01                                | 0.13    |
| <i>IL-12 p70</i> | 1.00                                | 0.21    | 1.00                                | 0.14    | 0.91                                | 0.18    | 1.04                                | 0.15    |
| <i>IL-13</i>     | 1.00                                | 0.06    | 0.98                                | 0.17    | 1.12                                | 0.09    | 1.25                                | 0.17    |
| <i>IL-15</i>     | 1.00                                | 0.14    | 0.86                                | 0.10    | 1.05                                | 0.08    | 1.18                                | 0.11    |
| <i>IL-16</i>     | 1.00                                | 0.17    | 0.89                                | 0.09    | 1.02                                | 0.06    | 1.14                                | 0.07    |
| <i>IL-17</i>     | 1.00                                | 0.22    | 1.04                                | 0.13    | 1.04                                | 0.20    | 1.11                                | 0.12    |
| <i>IL-1a</i>     | 1.00                                | 0.12    | 0.97                                | 0.16    | 1.22                                | 0.08    | 1.21                                | 0.11    |
| <i>IL-1b</i>     | 1.00                                | 0.12    | 0.84                                | 0.09    | 1.12                                | 0.07    | 1.09                                | 0.12    |
| <i>IL-1ra</i>    | 1.00                                | 0.16    | 0.88                                | 0.10    | 1.10                                | 0.09    | 1.17                                | 0.10    |
| <i>IL-2</i>      | 1.00                                | 0.13    | 0.84                                | 0.09    | 1.12                                | 0.07    | 1.14                                | 0.14    |
| <i>IL-2 Ra</i>   | 1.00                                | 0.22    | 0.99                                | 0.19    | 0.99                                | 0.21    | 1.20                                | 0.10    |
| <i>IL-3</i>      | 1.00                                | 0.16    | 0.99                                | 0.11    | 1.23                                | 0.04    | 1.30                                | 0.11    |
| <i>IL-4</i>      | 1.00                                | 0.15    | 0.90                                | 0.10    | 1.07                                | 0.06    | 1.16                                | 0.07    |
| <i>IL-5</i>      | 1.00                                | 0.18    | 0.83                                | 0.11    | 1.00                                | 0.09    | 1.10                                | 0.07    |
| <i>IL-6</i>      | 1.00                                | 0.08    | 4.92                                | 3.49    | 14.56                               | 7.47    | 20.38                               | 9.55    |
| <i>IL-7</i>      | 1.00                                | 0.16    | 1.03                                | 0.13    | 1.03                                | 0.08    | 1.26                                | 0.10    |
| <i>IL-8</i>      | 1.00                                | 0.21    | 1.18                                | 0.35    | 2.13                                | 1.24    | 3.29                                | 1.51    |
| <i>IL1R4</i>     | 1.00                                | 0.24    | 1.08                                | 0.25    | 1.17                                | 0.33    | 1.27                                | 0.39    |
| <i>Leptin</i>    | 1.00                                | 0.15    | 0.85                                | 0.05    | 1.00                                | 0.18    | 1.25                                | 0.19    |
| <i>LIGHT</i>     | 1.00                                | 0.15    | 1.02                                | 0.20    | 1.08                                | 0.08    | 1.16                                | 0.09    |
| <i>M-CSF</i>     | 1.00                                | 0.13    | 0.93                                | 0.06    | 1.06                                | 0.07    | 1.10                                | 0.07    |
| <i>MCP1</i>      | 1.00                                | 0.34    | 1.19                                | 0.54    | 3.12                                | 0.63    | 3.00                                | 0.48    |
| <i>MCP2</i>      | 1.00                                | 0.15    | 1.03                                | 0.24    | 1.66                                | 0.39    | 2.35                                | 0.80    |
| <i>MCP3</i>      | 1.00                                | 0.18    | 1.05                                | 0.29    | 7.96                                | 3.85    | 9.81                                | 4.32    |
| <i>MCP4</i>      | 1.00                                | 0.16    | 0.96                                | 0.08    | 1.05                                | 0.06    | 1.12                                | 0.09    |
| <i>MDC</i>       | 1.00                                | 0.19    | 0.88                                | 0.07    | 1.00                                | 0.06    | 1.12                                | 0.09    |
| <i>MIF</i>       | 1.00                                | 0.30    | 1.76                                | 0.61    | 0.96                                | 0.33    | 1.23                                | 0.38    |
| <i>MIG</i>       | 1.00                                | 0.15    | 0.85                                | 0.12    | 1.31                                | 0.03    | 1.17                                | 0.10    |
| <i>MIP-1a</i>    | 1.00                                | 0.21    | 1.07                                | 0.14    | 0.90                                | 0.15    | 1.21                                | 0.07    |
| <i>MIP-1b</i>    | 1.00                                | 0.23    | 1.02                                | 0.14    | 0.82                                | 0.15    | 1.09                                | 0.11    |
| <i>MIP-1d</i>    | 1.00                                | 0.14    | 0.98                                | 0.07    | 1.10                                | 0.08    | 1.14                                | 0.08    |
| <i>MIP-3a</i>    | 1.00                                | 0.17    | 1.11                                | 0.27    | 1.31                                | 0.26    | 2.49                                | 0.81    |
| <i>MIP-3b</i>    | 1.00                                | 0.18    | 0.97                                | 0.16    | 0.89                                | 0.11    | 1.00                                | 0.17    |
| <i>MSP-a</i>     | 1.00                                | 0.21    | 0.97                                | 0.18    | 0.92                                | 0.21    | 1.02                                | 0.14    |
| <i>NAP-2</i>     | 1.00                                | 0.12    | 1.00                                | 0.04    | 1.07                                | 0.07    | 1.42                                | 0.21    |
| <i>NT-3</i>      | 1.00                                | 0.17    | 0.93                                | 0.06    | 1.03                                | 0.07    | 1.12                                | 0.08    |
| <i>NT-4</i>      | 1.00                                | 0.31    | 0.92                                | 0.16    | 0.87                                | 0.15    | 0.90                                | 0.10    |
| <i>OPG</i>       | 1.00                                | 0.39    | 2.31                                | 0.54    | 1.45                                | 0.22    | 5.44                                | 1.38    |
| <i>OSM</i>       | 1.00                                | 0.16    | 0.81                                | 0.08    | 0.81                                | 0.15    | 0.78                                | 0.10    |
| <i>PARC</i>      | 1.00                                | 0.15    | 0.95                                | 0.06    | 1.06                                | 0.08    | 1.16                                | 0.07    |
| <i>PDGF-BB</i>   | 1.00                                | 0.14    | 0.86                                | 0.09    | 1.01                                | 0.06    | 1.12                                | 0.09    |
| <i>PLGF</i>      | 1.00                                | 0.20    | 1.01                                | 0.14    | 0.93                                | 0.18    | 1.06                                | 0.18    |
| <i>RANTES</i>    | 1.00                                | 0.18    | 1.03                                | 0.28    | 24.27                               | 3.43    | 27.75                               | 2.13    |
| <i>SCF</i>       | 1.00                                | 0.20    | 0.91                                | 0.08    | 0.97                                | 0.06    | 1.10                                | 0.08    |
| <i>SDF-1</i>     | 1.00                                | 0.15    | 0.85                                | 0.10    | 1.03                                | 0.06    | 1.14                                | 0.08    |
| <i>sgp130</i>    | 1.00                                | 0.22    | 0.99                                | 0.16    | 0.94                                | 0.20    | 1.08                                | 0.11    |
| <i>siGF-1R</i>   | 1.00                                | 0.17    | 0.98                                | 0.13    | 0.81                                | 0.11    | 1.01                                | 0.13    |
| <i>siL-6R</i>    | 1.00                                | 0.22    | 0.94                                | 0.20    | 1.00                                | 0.18    | 1.12                                | 0.09    |
| <i>sTNFR1</i>    | 1.00                                | 0.23    | 0.98                                | 0.19    | 0.90                                | 0.19    | 1.08                                | 0.09    |
| <i>sTNFR2</i>    | 1.00                                | 0.24    | 1.06                                | 0.12    | 0.88                                | 0.19    | 1.07                                | 0.13    |
| <i>TARC</i>      | 1.00                                | 0.15    | 0.96                                | 0.06    | 1.02                                | 0.08    | 1.17                                | 0.12    |
| <i>TECK</i>      | 1.00                                | 0.21    | 1.01                                | 0.24    | 0.91                                | 0.16    | 1.15                                | 0.10    |
| <i>TGF-b1</i>    | 1.00                                | 0.12    | 0.95                                | 0.12    | 1.10                                | 0.05    | 1.19                                | 0.12    |
| <i>TGF-b3</i>    | 1.00                                | 0.13    | 1.00                                | 0.04    | 1.07                                | 0.08    | 1.20                                | 0.08    |
| <i>THPO</i>      | 1.00                                | 0.23    | 1.00                                | 0.14    | 0.89                                | 0.22    | 1.07                                | 0.12    |
| <i>TIMP1</i>     | 1.00                                | 0.40    | 1.36                                | 0.56    | 1.30                                | 0.63    | 1.49                                | 0.76    |
| <i>TIMP2</i>     | 1.00                                | 0.38    | 1.31                                | 0.38    | 1.17                                | 0.41    | 1.18                                | 0.34    |
| <i>TNF-a</i>     | 1.00                                | 0.12    | 1.17                                | 0.23    | 10.35                               | 4.21    | 10.19                               | 4.01    |
| <i>TRAIL R3</i>  | 1.00                                | 0.24    | 1.00                                | 0.17    | 0.87                                | 0.12    | 1.09                                | 0.11    |
| <i>TRAIL R4</i>  | 1.00                                | 0.31    | 1.03                                | 0.20    | 0.95                                | 0.22    | 1.03                                | 0.19    |
| <i>uPAR</i>      | 1.00                                | 0.23    | 1.00                                | 0.22    | 1.07                                | 0.16    | 1.14                                | 0.17    |
| <i>VEGF-A</i>    | 1.00                                | 0.24    | 0.82                                | 0.17    | 0.88                                | 0.13    | 0.95                                | 0.07    |
| <i>VEGF-D</i>    | 1.00                                | 0.20    | 0.96                                | 0.17    | 0.93                                | 0.16    | 0.96                                | 0.16    |
| <i>XCL1</i>      | 1.00                                | 0.18    | 0.93                                | 0.17    | 0.88                                | 0.13    | 1.11                                | 0.11    |

**Table S3:** Muscle biopsies donors informations.

|              | MEAN   | SEM   |
|--------------|--------|-------|
| Age          | 22.79  | 0.38  |
| Height       | 182.79 | 1.71  |
| Weight       | 75.96  | 1.89  |
| BMI          | 22.71  | 0.39  |
|              |        |       |
| P            | 51.36  | 1.84  |
| S-BP (mmHg)  | 135.71 | 1.87  |
| D-BP (mmHg)  | 78.43  | 1.62  |
|              |        |       |
| Hb           | 9.10   | 0.16  |
| Hct          | 0.43   | 0.01  |
| Leuco        | 5.67   | 0.36  |
| Trombo       | 214.21 | 10.42 |
| Crp          | 1.43   | 0.43  |
| Na           | 142.50 | 0.57  |
| K            | 3.91   | 0.05  |
| TG           | 0.89   | 0.11  |
| Total chol   | 4.15   | 0.21  |
| HDL          | 1.44   | 0.06  |
| LDL          | 2.34   | 0.18  |
| Creatinin    | 82.64  | 2.68  |
| Carbamid     | 5.24   | 0.43  |
| ALAT         | 18.18  | 1.51  |
| Bilirubin    | 13.36  | 1.91  |
| Alcalic phos | 61.43  | 4.52  |
| F II+VII+X   | 0.66   | 0.02  |
| HbA1c        | 5.11   | 0.05  |
| TSH          | 2.13   | 0.22  |
